# Supplementary material for: Effects of core stability exercises on balance among Chinese children and youth with intellectual disabilities
Source: PeerJ. 2025 Dec 9;13:e20454. doi: 10.7717/peerj.20454 (PMC12700112; doi:10.7717/peerj.20454)
Supplement: Supplemental Information 2 — Translation for “ID” is “ID Balance Performance Test Data” [file peerj-13-20454-s002.xlsx]

## Sheet: ID平衡前测
group	Personal basic information											pretest										posttest
												OLS (s)				YBT-LQ (cm)						OLS (s)				YBT-LQ (cm)
	Numbering	年级	班级	性别	出生日期	Age	Type of disability	ID severity (2=severe;3=moderate)	Height（m）	Weight(kg)	BMI	EO, FI	EC, FI	EO, FO	EC, FO	left-AT	left-PM	left-PL	right-AT	right-PM	right-PL	EO, FI	EC, FI	EO, FO	EC, FO	left-AT	left-PM	left-PL	right-AT	right-PM	right-PL
control group	1	四年级	1班	2	2014-02-20	11	intellectual disability	3	1.38	24.7	12.97	8	2	3	2	46	45	56	45	66	68	6	4	5	2	36	46	60	38	54	46
control group	2	四年级	2班	1	2013-05-23	12	intellectual disability	3	1.32	32.1	18.4229	6.47	4.78	3.97	1.13	37	45	48	42	47	51	2.02	1.6	3.28	1.28	32	44	46	38	50	48
control group	3	四年级	3班	1	2012-02-25	13	intellectual disability	3	1.32	28.05	16.0985	9.05	6.25	6.62	3.68	45	44	52	32	46	58	8.53	6.75	4.18	2.75	36	46	54	26	44	54
control group	4	四年级	5班	1	2013-08-27	12	intellectual disability	3	1.4	27.1	13.8265	6.09	1.03	1.22	0.91	56	59	63	59	58	66	6.56	2.36	2.46	1.78	48	56	64	50	58	69
control group	5	五年级	2班	2	2012-08-26	13	intellectual disability	3	1.52	33.9	14.6728	1.2	1.1	0.9	0.8	58	54	73	55	60	63	1.03	0.89	1.03	0.81	52	61	75	53	66	65
control group	6	五年级	4班	1	2010-10-14	15	intellectual disability	3	1.46	38.95	18.2727	6.82	3.09	2.1	2.23	43	60	52	51	44	76	7.34	1.86	1.01	0.71	44	70	54	42	51	76
control group	7	五年级	4班	1	2013-01-28	12	intellectual disability	3	1.5	41.85	18.6	13.59	8.55	6.42	3.13	48	70	71	54	68	79	14	8.66	6	2.86	49	71	82	49	73	88
control group	8	五年级	5班	2	2012-10-15	13	intellectual disability	3	1.49	29.05	13.085	6.67	5.69	5.67	1.67	41	53	59	35	50	68	7.53	4.91	3.31	3.63	39	56	60	37	68	64
control group	9	五年级	5班	2	2012-10-01	13	intellectual disability	3	1.42	51.8	25.6893	5.4	2.93	2.9	1.82	35	52	65	43	46	60	5.69	2.84	3.37	2.19	34	52	70	32	52	56
control group	10	六年级	1班	1	2013-01-19	12	intellectual disability	3	1.51	38.5	16.8852	5.66	2.38	2.01	2.53	55	82	88	47	89	94	6.93	2.84	2.2	2.72	54	80	81	46	76	92
control group	11	六年级	2班	1	2010-09-15	15	intellectual disability	3	1.63	50.65	19.0636	14.72	7.66	2.68	1.27	30	76	67	42	70	60	14.89	10	9	5	32	68	58	36	70	56
control group	12	六年级	2班	1	2011-10-25	14	intellectual disability	2	1.51	44.7	19.6044	6.83	5.63	2.04	1.64	28	50	54	34	60	66	5	4	4	1	30	60	56	26	50	56
control group	13	六年级	2班	1	2011-11-19	14	intellectual disability	3	1.52	54.15	23.4375	6.01	5.46	2.76	2.33	34	56	53	26	50	51	5	5	4.15	1	36	60	58	32	54	58
control group	14	六年级	3班	2	2010-11-05	15	intellectual disability	2	1.4	36.15	18.4439	5.85	3.1	1.44	1.1	40	42	64	30	48	60	6.28	3.91	2.81	2.25	46	62	86	46	64	67
control group	15	六年级	3班	2	2012-01-02	13	intellectual disability	2	1.41	39	19.6167	2.63	1.79	1.54	1.5	49	68	71	46	65	70	2.4	1.68	1.56	0.97	48	66	70	42	67	72
control group	16	六年级	4班	1	2012-01-07	13	intellectual disability	2	1.49	43.45	19.5712	2.1	1.2	1.3	0.9	30	43	44	16	22	28	2.8	1.1	2.1	1.3	32	42	40	34	38	44
control group	17	六年级	5班	2	2011-05-30	14	intellectual disability	3	1.55	37.3	15.5255	8.75	5.28	4.91	3.22	40	66	76	56	73	88	7.03	6.55	4.03	2.94	41	70	77	47	71	81
intervention group	18	四年级	1班	1	2013-03-22	12	intellectual disability	3	1.39	39	20.1853	9.98	7.11	4.81	2.31	82	88	106	86	74	88	13.28	7.44	2.44	2.02	48	60	76	68	70	70
intervention group	19	四年级	2班	1	2014-01-20	11	intellectual disability	3	1.4	41.75	21.301	5.03	2.28	3.62	2.34	33	47	50	28	49	55	12.81	4.78	3.94	2.11	54	72	86	68	72	84
intervention group	20	四年级	3班	2	2013-02-21	12	intellectual disability	2	1.36	60.9	32.926	3.87	2.9	2.12	1.13	34	42	50	38	50	50	4.25	3.68	2.28	1.34	42	56	54	44	52	54
intervention group	21	四年级	3班	2	2012-11-12	13	intellectual disability	3	1.42	43.25	21.4491	1.53	1.27	1.54	0.81	26	36	44	26	38	40	3.25	2.82	1.56	1.15	42	52	62	46	64	64
intervention group	22	四年级	6班	1	2013-02-04	12	intellectual disability	3	1.47	45.15	20.8941	5.1	2.1	1.3	1.1	34	56	50	34	76	54	10.53	1.32	1.62	1.46	58	88	87	49	96	94
intervention group	23	四年级	6班	1	2013-06-14	12	intellectual disability	2	1.5	47.35	21.0444	2.44	1.78	1.24	1.1	22	46	30	18	48	54	4.54	1.96	3.43	1.56	44	84	82	35	90	85
intervention group	24	四年级	6班	2	2013-02-08	12	intellectual disability	2	1.37	31.85	16.9695	7.54	2.89	4	3.78	40	56	70	52	61	69	10	3	5	2	46	79	86	56	71	94
intervention group	25	四年级	6班	2	2014-08-02	11	intellectual disability	3	1.41	35.2	17.7053	6.47	3.01	2.83	2.25	40	40	45	40	44	50	14.39	4.4	4.1	3.03	50	96	94	55	92	100
intervention group	26	五年级	2班	1	2013-08-15	12	intellectual disability	3	1.43	56.65	27.7031	3.69	3.21	3.62	2.34	28	72	50	40	68	71	5.82	3.94	4.11	2.35	65	80	109	63	74	107
intervention group	27	五年级	3班	1	2011-07-15	14	intellectual disability	2	1.55	35.75	14.8803	3.49	1.89	2.15	1.06	42	54	68	30	56	60	8.19	1.67	3.47	2.19	66	100	105	72	104	108
intervention group	28	五年级	3班	2	2012-12-07	13	intellectual disability	2	1.39	33.2	17.1834	3.1	3.07	3.22	1.21	42	60	60	40	65	64	5.52	2.39	5.04	2.01	62	85	89	70	91	89
intervention group	29	六年级	1班	1	2012-03-24	13	intellectual disability	3	1.39	30.45	15.7601	13.61	5.56	3.18	2.26	58	68	94	48	92	86	25	10.22	7.72	5.03	82	116	120	68	114	124
intervention group	30	六年级	2班	1	2012-03-29	13	intellectual disability	3	1.45	47.9	22.7824	9.22	4.2	3.24	2.53	46	56	60	70	60	78	7	3	2	1	48	64	72	44	66	90
intervention group	31	六年级	4班	1	2012-04-20	13	intellectual disability	3	1.52	33.4	14.4564	12.48	5.54	3.05	3.21	36	60	64	36	58	64	21.51	6.5	6.66	4.34	46	83	80	46	85	90
intervention group	32	六年级	4班	1	2011-02-21	14	intellectual disability	3	1.6	45.45	17.7539	11.84	10.33	4.31	4.1	68	100	90	54	80	90	18.59	9.19	3.5	3.41	56	93	78	44	81	80
intervention group	33	六年级	5班	1	2009-04-11	16	intellectual disability	3	1.6	53.2	20.7812	11.99	5.06	6.68	2.24	54	46	48	46	36	40	24.98	5	4.11	3.06	52	80	86	56	83	93
intervention group	34	六年级	5班	2	2011-08-04	14	intellectual disability	2	1.2	30.55	21.2153	15	9.74	8.8	2.1	22	64	56	24	60	50	23.69	10.02	9.08	3.15	74	74	86	66	76	92
intervention group	35	六年级	5班	2	2011-12-03	14	intellectual disability	3	1.59	43.7	17.2857	10.68	7.33	7.31	2.26	39	44	66	44	40	56	13.64	4.3	4.1	3.01	72	67	90	80	76	104
Note: YBT-LQ = Lower Quarter Y Balance Test; OLS = one-legged stance; EO = eyes opened; EC = eyes closed; FI = firm ground; FO = foam ground; AT = anterior; PM = posteromedial; PL = posterolateral..
